# Supplementary material
Source: PubMed Central journal article supplement (PMC6739250)
Supplement: yam-62-244-s001.pdf [file yam-62-244-s001.pdf]

**Supplementary Table S1. Variants details, HPO term and rank positions of causative variants in simulated disease data**

| ID | Disease<br>(OMIM term)                           | Gene         | HGVS<br>notation<br>(GRCh37/<br>hg19) | Inheritance | HPO ID      |             |             |             |             | Rank    |        |              |                             |                                 |
|----|--------------------------------------------------|--------------|---------------------------------------|-------------|-------------|-------------|-------------|-------------|-------------|---------|--------|--------------|-----------------------------|---------------------------------|
|    |                                                  |              |                                       |             |             |             |             |             |             | hiPHIVE | PhenIX | Phen-<br>Gen | combined<br>max<br>(eXtasy) | order<br>statistics<br>(eXtasy) |
| 1  | Usher syndrome<br>1D/F                           | <i>CDH23</i> | g.7355814<br>2T>G                     | AD,DR       | 0000<br>365 | 0000<br>510 | 0001<br>751 | 1           | 1           | -       | -      | -            |                             |                                 |
| 2  | DEAFNESS,<br>AUTOSOMAL<br>DOMINANT 3A;<br>DFNA3A | <i>GJB2</i>  | g.2076332<br>3C>T                     | AD          | 0000<br>407 |             |             | 1           | 1           | -       | ×      | ×            |                             |                                 |
| 3  | DEAFNESS,<br>AUTOSOMAL<br>DOMINANT 3A;<br>DFNA3A | <i>GJB2</i>  | g.2076344<br>2C>T                     | AD          | 0000<br>407 |             |             | 1           | 3           | 2       | ×      | ×            |                             |                                 |
| 4  | DEAFNESS,<br>AUTOSOMAL<br>DOMINANT 3A;<br>DFNA3A | <i>GJB2</i>  | g.2076358<br>7C>T                     | AD          | 0000<br>407 |             |             | 1           | 1           | 5       | ×      | ×            |                             |                                 |
| 5  | ALZHEIMER<br>DISEASE 3; AD                       | <i>PSEN1</i> | g.7364037<br>5C>T                     | AD          | 0001<br>260 | 0001<br>332 | 0002<br>395 | 0002<br>354 | 0002<br>185 | 1       | 1      | 5            | 1                           | 2                               |
| 6  | DEAFNESS,<br>AUTOSOMAL<br>DOMINANT 20;<br>DFNA20 | <i>ACTG1</i> | g.7947821<br>4C>T                     | AD          | 0008<br>619 | 0000<br>408 |             |             |             | 1       | 1      | -            | 279                         | 334                             |

**Supplementary Table S1 – Continued**

|    |                                                 |             |                                             |       |             |             |             |             |             |   |   |   |     |     |
|----|-------------------------------------------------|-------------|---------------------------------------------|-------|-------------|-------------|-------------|-------------|-------------|---|---|---|-----|-----|
| 7  | PARKINSON<br>DISEASE, LATE-<br>ONSET; PD        | <i>MAPT</i> | g.4408773<br>9A>C                           | AD,Mu | 0000<br>726 | 0001<br>300 | 0000<br>751 | 0002<br>172 | 0001<br>621 | 1 | 2 | - | 5   | 2   |
| 8  | PULMONARY<br>HYPERTENSION,<br>PRIMARY, 1; PPH1  | <i>BMP2</i> | g.2033295<br>55T>C                          | AD    | 0000<br>822 | 0005<br>308 | 0005<br>312 | 0001<br>708 | 0001<br>009 | 1 | 1 | - | 66  | 35  |
| 9  | PULMONARY<br>HYPERTENSION,<br>PRIMARY, 1; PPH1  | <i>BMP2</i> | g.2033835<br>87_20338<br>3588delin<br>sAAGG | AD    | 0011<br>353 | 0004<br>964 | 0005<br>308 | 0005<br>312 | 0001<br>667 | 1 | 1 | - | -   | -   |
| 10 | PULMONARY<br>HYPERTENSION,<br>PRIMARY, 1; PPH1  | <i>BMP2</i> | g.2033848<br>58T>C                          | AD    | 0001<br>977 | 0005<br>317 | 0004<br>964 | 0005<br>308 | 0001<br>667 | 1 | 1 | 8 | 73  | 14  |
| 11 | FEINGOLD<br>SYNDROME 1;<br>FGLDS1               | <i>MYCN</i> | g.1608594<br>1C>T                           | AD    | 0004<br>691 | 0004<br>692 | 0000<br>958 | 0000<br>437 | 0000<br>232 | 1 | 1 | - | 270 | 178 |
| 12 | DEAFNESS,<br>AUTOSOMAL<br>RECESSIVE 9;<br>DFNB9 | <i>OTOF</i> | g.2668289<br>5A>G                           | AR    | 0008<br>529 | 0004<br>463 | 0000<br>407 |             |             | 1 | 1 | - | ×   | ×   |
| 13 | DEAFNESS,<br>AUTOSOMAL<br>RECESSIVE 9;<br>DFNB9 | <i>OTOF</i> | g.2668361<br>7T>C                           | AR    | 0008<br>529 | 0004<br>463 | 0000<br>407 |             |             | 1 | 1 | 4 | ×   | ×   |

**Supplementary Table S1 – Continued**

|    |                                                 |                |                    |    |             |             |             |             |             |   |   |   |    |    |
|----|-------------------------------------------------|----------------|--------------------|----|-------------|-------------|-------------|-------------|-------------|---|---|---|----|----|
| 14 | DEAFNESS,<br>AUTOSOMAL<br>RECESSIVE 9;<br>DFNB9 | <i>OTOF</i>    | g.2668386<br>5C>T  | AR | 0004<br>463 | 0000<br>407 |             |             |             | 1 | 1 | 4 | ×  | ×  |
| 15 | NOONAN<br>SYNDROME 4;<br>NS4                    | <i>SOS1</i>    | g.3926258<br>1C>A  | AD | 0000<br>028 | 0000<br>689 | 0000<br>494 | 0000<br>368 | 0003<br>010 | 1 | 1 | 2 | 2  | 2  |
| 16 | DEAFNESS,<br>AUTOSOMAL<br>RECESSIVE 8;<br>DFNB8 | <i>TMPRSS3</i> | g.4380408<br>8G>A  | AR | 0000<br>407 |             |             |             |             | 1 | 1 | - | ×  | ×  |
| 17 | GLYCINE<br>ENCEPHALOPATH<br>Y; GCE              | <i>AMT</i>     | g.4945957<br>8G>A  | AR | 0001<br>298 | 0002<br>154 | 0000<br>737 | 0001<br>336 | 0100<br>247 | 1 | 1 | 5 | 8  | 1  |
| 18 | METHYLMALONI<br>C ACIDURIA, cblA<br>TYPE        | <i>MMAA</i>    | g.1465607<br>24C>T | AR | 0001<br>944 | 0001<br>987 | 0002<br>154 | 0001<br>250 | 0002<br>013 | 1 | 1 | - | 58 | 26 |
| 19 | SOTOS<br>SYNDROME 1;<br>SOTOS1                  | <i>NSDI</i>    | g.1766946<br>45G>A | AD | 0002<br>280 | 0000<br>218 | 0001<br>943 | 0000<br>347 | 0001<br>319 | 1 | 1 | - | 17 | 9  |
| 20 | CARDIOFACIOCU<br>TANEOUS<br>SYNDROME 1;<br>CFC1 | <i>BRAF</i>    | g.1405013<br>36C>G | AD | 0000<br>280 | 0002<br>750 | 0000<br>768 | 0004<br>322 | 0002<br>217 | 1 | 1 | 5 | 1  | 2  |

**Supplementary Table S1 – Continued**

|    |                                                                                                       |                |                    |    |             |             |             |             |             |   |   |   |    |    |
|----|-------------------------------------------------------------------------------------------------------|----------------|--------------------|----|-------------|-------------|-------------|-------------|-------------|---|---|---|----|----|
| 21 | LONG QT<br>SYNDROME 1;<br>LQT1                                                                        | <i>KCNQ1</i>   | g.1506486<br>32A>G | AD | 0000<br>598 | 0001<br>657 | 0001<br>279 | 0001<br>664 | 0001<br>663 | - | - | - | -  | -  |
| 22 | ANTLEY-BIXLER<br>SYNDROME<br>WITH GENITAL<br>ANOMALIES AND<br>DISORDERED<br>STEROIDOGENES<br>IS; ABS1 | <i>POR</i>     | g.7561516<br>3delG | AR | 0000<br>818 | 0012<br>385 | 0000<br>047 | 0000<br>054 | 0002<br>650 | 1 | 1 | - | 14 | 21 |
| 23 | DEAFNESS,<br>AUTOSOMAL<br>RECESSIVE 4,<br>WITH ENLARGED<br>VESTIBULAR<br>AQUEDUCT;<br>DFNB4           | <i>SLC26A4</i> | g.1073038<br>02C>T | AR | 0011<br>387 | 0000<br>376 | 0000<br>407 |             |             | 1 | 1 | - | ×  | ×  |
| 24 | DEAFNESS,<br>AUTOSOMAL<br>RECESSIVE 4,<br>WITH ENLARGED<br>VESTIBULAR<br>AQUEDUCT;<br>DFNB4           | <i>SLC26A4</i> | g.1073237<br>71C>A | AR | 0011<br>387 | 0000<br>376 | 0000<br>407 |             |             | 1 | 1 | 2 | ×  | ×  |

**Supplementary Table S1 – Continued**

|    |                                                                                             |                    |                                  |    |             |             |             |             |             |   |   |   |   |    |
|----|---------------------------------------------------------------------------------------------|--------------------|----------------------------------|----|-------------|-------------|-------------|-------------|-------------|---|---|---|---|----|
| 25 | DEAFNESS,<br>AUTOSOMAL<br>RECESSIVE 4,<br>WITH ENLARGED<br>VESTIBULAR<br>AQUEDUCT;<br>DFNB4 | <i>SLC26A</i><br>4 | g.1073348<br>99G>A               | AR | 0011<br>387 | 0000<br>376 | 0000<br>407 |             |             | 1 | 1 | - | × | ×  |
| 26 | DEAFNESS,<br>AUTOSOMAL<br>RECESSIVE 4,<br>WITH ENLARGED<br>VESTIBULAR<br>AQUEDUCT;<br>DFNB4 | <i>SLC26A</i><br>4 | g.1073505<br>76C>T               | AR | 0011<br>387 | 0000<br>376 | 0000<br>407 |             |             | 1 | 1 | - | × | ×  |
| 27 | CHARGE<br>SYNDROME                                                                          | <i>CHD7</i>        | g.6165438<br>5G>T                | AD | 0002<br>023 | 0002<br>410 | 0000<br>717 | 0001<br>511 | 0000<br>394 | 1 | 1 | - | - | -  |
| 28 | BRANCHIOOTOR<br>ENAL<br>SYNDROME 1;<br>BOR1                                                 | <i>EYAI</i>        | g.7221143<br>0G>C                | AD | 0004<br>742 | 0009<br>798 | 0008<br>551 | 0000<br>410 | 0000<br>104 | 1 | 1 | - | 5 | 42 |
| 29 | BECKWITH-<br>WIEDEMANN<br>SYNDROME; BWS                                                     | <i>CDKN1C</i>      | g.2906409<br>_2906410<br>delinsC | AD | 0002<br>060 | 0004<br>742 | 0009<br>795 | 0009<br>797 | 0000<br>113 | 7 | 5 | - | - | -  |

**Supplementary Table S1 – Continued**

|    |                                                   |                 |                                                   |    |             |             |             |             |             |   |    |   |   |   |
|----|---------------------------------------------------|-----------------|---------------------------------------------------|----|-------------|-------------|-------------|-------------|-------------|---|----|---|---|---|
| 30 | WIEDEMANN-<br>STEINER<br>SYNDROME;<br>WDSTS       | <i>KMT2A</i>    | g.1183440<br>21delC                               | AD | 0009<br>796 | 0001<br>374 | 0010<br>628 | 0000<br>691 | 0000<br>384 | 2 | 13 | - | - | - |
| 31 | HYPOURICEMIA,<br>RENAL, 1; RHUC1                  | <i>SLC22A12</i> | g.6436035<br>5G>A                                 | AR | 0001<br>919 | 0003<br>537 | 0012<br>611 | 0000<br>791 |             | 1 | 1  | - | × | × |
| 32 | DEAFNESS,<br>AUTOSOMAL<br>RECESSIVE 21;<br>DFNB21 | <i>TECTA</i>    | g.1209987<br>73G>C                                | AR | 0000<br>407 |             |             |             |             | 1 | 1  | - | × | × |
| 33 | KABUKI<br>SYNDROME 1;<br>KABUK1                   | <i>KMT2D</i>    | g.4942030<br>4_494203<br>05delAA                  | AD | 0000<br>164 | 0000<br>175 | 0000<br>218 | 0010<br>314 | 0000<br>508 | 1 | 1  | - | - | - |
| 34 | KABUKI<br>SYNDROME 1;<br>KABUK1                   | <i>KMT2D</i>    | g.4943864<br>7G>A                                 | AD | 0000<br>592 | 0001<br>680 | 0004<br>736 | 0001<br>212 | 0000<br>403 | 1 | 1  | - | - | - |
| 35 | KABUKI<br>SYNDROME 1;<br>KABUK1                   | <i>KMT2D</i>    | g.4944446<br>3C>A                                 | AD | 0000<br>365 | 0001<br>382 | 0000<br>252 | 0000<br>358 | 0000<br>535 | 1 | 1  | - | - | - |
| 36 | KABUKI<br>SYNDROME 1;<br>KABUK1                   | <i>KMT2D</i>    | g.4944468<br>2_494446<br>83insGAG<br>GCCATC<br>CA | AD | 0001<br>007 | 0001<br>249 | 0001<br>382 | 0008<br>897 | 0002<br>650 | 1 | 1  | - | - | - |

**Supplementary Table S1 – Continued**

|    |                                                              |               |                                         |       |             |             |             |             |             |   |   |   |     |    |
|----|--------------------------------------------------------------|---------------|-----------------------------------------|-------|-------------|-------------|-------------|-------------|-------------|---|---|---|-----|----|
| 37 | KABUKI<br>SYNDROME 1;<br>KABUK1                              | <i>KMT2D</i>  | g.4944708<br>8_494470<br>89delAG        | AD    | 0000<br>164 | 0004<br>736 | 0000<br>400 | 0000<br>358 | 0004<br>467 | 1 | 1 | - | -   | -  |
| 38 | LISSENCEPHALY<br>3; LIS3                                     | <i>TUBA1A</i> | g.4958043<br>0G>A                       | AD    | 0001<br>251 | 0010<br>864 | 0000<br>252 | 0001<br>250 | 0002<br>510 | 2 | 1 | - | 126 | 31 |
| 39 | DEAFNESS,<br>AUTOSOMAL<br>RECESSIVE 1A;<br>DFNB1A            | <i>GJB2</i>   | g.2076369<br>1dupC                      | DR,AR | 0000<br>407 | 0001<br>751 |             |             |             | 1 | 1 | 2 | ×   | ×  |
| 40 | PITUITARY<br>HORMONE<br>DEFICIENCY,<br>COMBINED, 6;<br>CPHD6 | <i>OTX2</i>   | g.5726876<br>1C>A                       | AD    | 0011<br>755 | 0004<br>322 |             |             |             | 1 | 1 | - | ×   | ×  |
| 41 | CARDIOFACIOCU<br>TANEOUS<br>SYNDROME 1;<br>CFC1              | <i>BRAF</i>   | g.2538028<br>0C>G                       | AD    | 0000<br>463 | 0001<br>622 | 0002<br>019 | 0000<br>486 | 0001<br>276 | - | - | - | -   | -  |
| 42 | NIJMEGEN<br>BREAKAGE<br>SYNDROME; NBS                        | <i>NBN</i>    | g.9098344<br>5_909834<br>49delGTT<br>TT | AR    | 0000<br>957 | 0000<br>175 | 0000<br>444 | 0006<br>532 | 0003<br>202 | 1 | 1 | - | -   | -  |

**Supplementary Table S1 – Continued**

|    |                                                                                             |                          |                                   |    |             |             |             |             |             |   |   |   |    |    |
|----|---------------------------------------------------------------------------------------------|--------------------------|-----------------------------------|----|-------------|-------------|-------------|-------------|-------------|---|---|---|----|----|
| 43 | LOEYS-DIETZ<br>SYNDROME 2;<br>LDS2                                                          | <i>TGFBR2</i>            | g.3071386<br>6C>G                 | AD | 0002<br>308 | 0001<br>363 | 0004<br>955 | 0100<br>259 | 0002<br>650 | 1 | 1 | 4 | 1  | 36 |
| 44 | MARFAN<br>SYNDROME; MFS                                                                     | <i>FBNI</i>              | g.4871292<br>3G>A                 | AD | 0000<br>494 | 0007<br>676 | 0007<br>800 | 0001<br>548 | 0003<br>179 | 1 | 1 | - | 3  | 68 |
| 45 | ANGELMAN<br>SYNDROME; AS                                                                    | <i>UBE3A</i>             | g.2561693<br>7delC                | IC | 0001<br>344 | 0002<br>286 | 0001<br>347 | 0005<br>484 | 0010<br>808 | 1 | 1 | - | -  | -  |
| 46 | ANGELMAN<br>SYNDROME; AS                                                                    | <i>UBE3A</i>             | g.2562083<br>7A>G                 | IC | 0001<br>344 | 0002<br>019 | 0000<br>272 | 0000<br>639 | 0010<br>808 | 1 | 1 | - | 62 | 21 |
| 47 | RUBINSTEIN-<br>TAYBI<br>SYNDROME 1;<br>RSTS1                                                | <i>CREBB</i><br><i>P</i> | g.3801726<br>C>A                  | AD | 0000<br>589 | 0000<br>028 | 0005<br>895 | 0002<br>788 | 0000<br>736 | 1 | 1 | - | -  | -  |
| 48 | LI-FRAUMENI<br>SYNDROME; LFS                                                                | <i>TP53</i>              | g.7574031<br>delG                 | AD | 0002<br>488 | 0006<br>744 | 0030<br>078 | 0002<br>667 | 0002<br>669 | 1 | 1 | - | -  | -  |
| 49 | DEAFNESS,<br>AUTOSOMAL<br>RECESSIVE 4,<br>WITH ENLARGED<br>VESTIBULAR<br>AQUEDUCT;<br>DFNB4 | <i>SLC26A</i><br>4       | g.1073405<br>60_10734<br>0561insT | AR | 0011<br>387 | 0000<br>376 | 0000<br>407 |             |             | 1 | 1 | 5 | ×  | ×  |
| 50 | CHARGE<br>SYNDROME                                                                          | <i>CHD7</i>              | g.6165459<br>5C>T                 | AD | 0001<br>719 | 0200<br>021 | 0000<br>252 | 0000<br>347 | 0000<br>054 | 1 | 1 | - | -  | -  |



**Supplementary Table S1 – Continued**

|    |                                    |             |                                         |    |             |             |             |             |             |   |   |   |     |    |
|----|------------------------------------|-------------|-----------------------------------------|----|-------------|-------------|-------------|-------------|-------------|---|---|---|-----|----|
| 51 | CHARGE<br>SYNDROME                 | <i>CHD7</i> | g.6165460<br>4C>T                       | AD | 0000<br>717 | 0001<br>156 | 0000<br>324 | 0001<br>539 | 0004<br>496 | 1 | 1 | 4 | -   | -  |
| 52 | CHARGE<br>SYNDROME                 | <i>CHD7</i> | g.6165501<br>6delA                      | AD | 0000<br>834 | 0100<br>736 | 0003<br>974 | 0010<br>751 | 0008<br>551 | 1 | 1 | - | -   | -  |
| 53 | CHARGE<br>SYNDROME                 | <i>CHD7</i> | g.6165502<br>7A>T                       | AD | 0000<br>048 | 0000<br>204 | 0000<br>378 | 0002<br>937 | 0003<br>022 | 1 | 1 | 3 | -   | -  |
| 54 | CHARGE<br>SYNDROME                 | <i>CHD7</i> | g.6169385<br>0_616938<br>51delCC        | AD | 0000<br>682 | 0010<br>669 | 0000<br>160 | 0000<br>388 | 0001<br>629 | 1 | 1 | - | -   | -  |
| 55 | CHARGE<br>SYNDROME                 | <i>CHD7</i> | g.6172895<br>1_617289<br>55delATC<br>TT | AD | 0000<br>772 | 0000<br>324 | 0000<br>044 | 0000<br>394 | 0001<br>561 | 1 | 1 | - | -   | -  |
| 56 | CHARGE<br>SYNDROME                 | <i>CHD7</i> | g.6174942<br>2C>T                       | AD | 0000<br>772 | 0002<br>015 | 0000<br>501 | 0000<br>568 | 0004<br>058 | 1 | 1 | 3 | -   | -  |
| 57 | CHARGE<br>SYNDROME                 | <i>CHD7</i> | g.6174952<br>9C>A                       | AD | 0000<br>772 | 0001<br>360 | 0002<br>901 | 0000<br>066 | 0001<br>171 | 1 | 1 | - | -   | -  |
| 58 | CHARGE<br>SYNDROME                 | <i>CHD7</i> | g.6176308<br>0dupT                      | AD | 0001<br>305 | 0000<br>821 | 0001<br>601 | 0001<br>252 | 0001<br>883 | 1 | 1 | 6 | -   | -  |
| 59 | CHARGE<br>SYNDROME                 | <i>CHD7</i> | g.6176923<br>9T>A                       | AD | 0009<br>738 | 0001<br>679 | 0000<br>488 | 0001<br>883 | 0001<br>629 | 5 | 1 | 3 | -   | -  |
| 60 | GLYCINE<br>ENCEPHALOPATH<br>Y; GCE | <i>GLDC</i> | g.6536188<br>A>C                        | AR | 0001<br>274 | 0000<br>718 | 0000<br>737 | 0001<br>336 | 0000<br>711 | 1 | 2 | - | 191 | 85 |

**Supplementary Table S1 – Continued**

|    |                                                                |               |                                        |     |             |             |             |             |             |   |   |   |     |     |
|----|----------------------------------------------------------------|---------------|----------------------------------------|-----|-------------|-------------|-------------|-------------|-------------|---|---|---|-----|-----|
| 61 | GLYCINE<br>ENCEPHALOPATH<br>Y; GCE                             | <i>GLDC</i>   | g.6588688<br>G>C                       | AR  | 0003<br>108 | 0001<br>249 | 0000<br>737 | 0100<br>247 | 0001<br>250 | 1 | 1 | 4 | 219 | 159 |
| 62 | CORNELIA DE<br>LANGE<br>SYNDROME 3;<br>CDLS3                   | <i>HDAC8</i>  | g.7178782<br>0G>A                      | AD  | 0001<br>263 | 0000<br>218 | 0000<br>527 | 0000<br>545 | 0200<br>055 | 1 | 1 | 3 | 60  | 94  |
| 63 | FOCAL DERMAL<br>HYPOPLASIA;<br>FDH                             | <i>PORCN</i>  | g.4836827<br>8C>T                      | XLD | 0001<br>274 | 0004<br>334 | 0100<br>559 | 0010<br>622 | 0009<br>381 | 1 | 1 | 2 | 340 | 198 |
| 64 | TELANGIECTASI<br>A, HEREDITARY<br>HEMORRHAGIC,<br>TYPE 2; HHT2 | <i>ACVRL1</i> | g.5230753<br>4C>T                      | AD  | 0001<br>342 | 0002<br>249 | 0000<br>434 | 0001<br>901 | 0001<br>694 | 1 | 1 | - | 163 | 76  |
| 65 | MOWAT-WILSON<br>SYNDROME;<br>MOWS                              | <i>ZEB2</i>   | g.1451588<br>26_14515<br>8827delC<br>T | AD  | 0040<br>082 | 0009<br>748 | 0004<br>415 | 0004<br>322 | 0001<br>636 | - | - | - | -   | -   |
| 66 | MOWAT-WILSON<br>SYNDROME;<br>MOWS                              | <i>ZEB2</i>   | g.1451588<br>71G>A                     | AD  | 0004<br>298 | 0008<br>572 | 0000<br>768 | 0002<br>558 | 0000<br>076 | - | - | - | -   | -   |

**Supplementary Table S1 – Continued**

|    |                                                                |            |                     |    |             |             |             |             |             |    |    |   |    |    |
|----|----------------------------------------------------------------|------------|---------------------|----|-------------|-------------|-------------|-------------|-------------|----|----|---|----|----|
| 67 | TELANGIECTASI<br>A, HEREDITARY<br>HEMORRHAGIC,<br>TYPE 1; HHT1 | <i>ENG</i> | g.1305794<br>83delC | AD | 0002<br>094 | 0001<br>901 | 0001<br>694 | 0001<br>250 | 0004<br>406 | 1  | 1  | - | -  | -  |
| 68 | TELANGIECTASI<br>A, HEREDITARY<br>HEMORRHAGIC,<br>TYPE 1; HHT1 | <i>ENG</i> | g.1305920<br>08delG | AD | 0001<br>903 | 0100<br>858 | 0002<br>573 | 0001<br>722 | 0011<br>934 | 1  | 1  | - | ×  | ×  |
| 69 | PHENYLKETONU<br>RIA; PKU                                       | <i>PAH</i> | g.1032342<br>88A>C  | AR | 0000<br>718 | 0002<br>514 | 0004<br>923 | 0001<br>347 | 0000<br>737 | -  | -  | - | -  | -  |
| 70 | ALAGILLE<br>SYNDROME 1;<br>ALGS1                               | <i>PAH</i> | g.1032454<br>74C>A  | AD | 0000<br>518 | 0000<br>490 | 0002<br>155 | 0000<br>110 | 0001<br>328 | 10 | 4  | 7 | 8  | 3  |
| 71 | ALAGILLE<br>SYNDROME 1;<br>ALGS1                               | <i>PAH</i> | g.1032466<br>80C>G  | AD | 0000<br>585 | 0000<br>490 | 0002<br>937 | 0003<br>022 | 0000<br>486 | 10 | 14 | 3 | 7  | 3  |
| 72 | ALAGILLE<br>SYNDROME 1;<br>ALGS1                               | <i>PAH</i> | g.1032466<br>96C>G  | AD | 0002<br>910 | 0002<br>937 | 0000<br>400 | 0004<br>969 | 0001<br>947 | 9  | 10 | - | 1  | 1  |
| 73 | ALAGILLE<br>SYNDROME 1;<br>ALGS1                               | <i>PAH</i> | g.1033065<br>82A>G  | AD | 0000<br>772 | 0001<br>394 | 0000<br>490 | 0005<br>280 | 0001<br>629 | 28 | 14 | - | 55 | 92 |

**Supplementary Table S1 – Continued**

|    |                                             |               |                    |     |             |             |             |             |             |   |   |   |    |     |
|----|---------------------------------------------|---------------|--------------------|-----|-------------|-------------|-------------|-------------|-------------|---|---|---|----|-----|
| 74 | MUCOPOLYSACC<br>HARIDOSIS, TYPE<br>II; MPS2 | <i>IDS</i>    | g.1485643<br>39G>A | XLR | 0002<br>159 | 0002<br>180 | 0000<br>648 | 0001<br>085 | 0001<br>761 | 1 | 1 | - | 95 | 79  |
| 75 | EXOSTOSES,<br>MULTIPLE, TYPE<br>II          | <i>EXT2</i>   | g.4415163<br>7C>A  | AD  | 0003<br>068 | 0003<br>276 | 0003<br>406 | 0000<br>896 | 0000<br>918 | 1 | 1 | 2 | ×  | ×   |
| 76 | MARFAN<br>SYNDROME; MFS                     | <i>FBNI</i>   | g.4872920<br>1G>A  | AD  | 0002<br>647 | 0000<br>494 | 0100<br>775 | 0000<br>565 | 0003<br>088 | 4 | 1 | - | 22 | 88  |
| 77 | MARFAN<br>SYNDROME; MFS                     | <i>FBNI</i>   | g.4872998<br>2C>A  | AD  | 0001<br>659 | 0000<br>268 | 0007<br>676 | 0000<br>189 | 0004<br>927 | 1 | 1 | 3 | 1  | 6   |
| 78 | MARFAN<br>SYNDROME; MFS                     | <i>FBNI</i>   | g.4875776<br>4C>T  | AD  | 0001<br>166 | 0000<br>268 | 0002<br>816 | 0000<br>501 | 0004<br>927 | 1 | 1 | 2 | -  | -   |
| 79 | MARFAN<br>SYNDROME; MFS                     | <i>FBNI</i>   | g.4878038<br>4T>C  | AD  | 0001<br>635 | 0001<br>002 | 0000<br>494 | 0000<br>275 | 0000<br>278 | 1 | 1 | - | 1  | 1   |
| 80 | Loeys-Dietz<br>syndrome 2                   | <i>TGFBR2</i> | g.3069178<br>5C>T  | AD  | 0001<br>156 | 0000<br>175 | 0000<br>316 | 0001<br>634 | 0000<br>278 | 1 | 1 | - | 1  | 2   |
| 81 | Loeys-Dietz<br>syndrome 2                   | <i>TGFBR2</i> | g.3071334<br>5C>T  | AD  | 0002<br>631 | 0001<br>647 | 0001<br>519 | 0009<br>473 | 0002<br>650 | 1 | 1 | - | 2  | 114 |
| 82 | Loeys-Dietz<br>syndrome 2                   | <i>TGFBR2</i> | g.3071370<br>5T>C  | AD  | 0000<br>766 | 0005<br>807 | 0004<br>955 | 0001<br>388 | 0000<br>347 | 1 | 1 | 3 | 1  | 1   |
| 83 | Loeys-Dietz<br>syndrome 2                   | <i>TGFBR2</i> | g.3073291<br>8C>T  | AD  | 0000<br>766 | 0004<br>944 | 0001<br>634 | 0001<br>643 | 0100<br>259 | 1 | 1 | 3 | 3  | 5   |
| 84 | Loeys-Dietz<br>syndrome 2                   | <i>TGFBR2</i> | g.3073296<br>9C>T  | AD  | 0001<br>631 | 0004<br>955 | 0009<br>473 | 0000<br>939 | 0001<br>762 | - | - | - | -  | -   |

**Supplementary Table S1 – Continued**

|    |                                                                |                           |                                        |     |             |             |             |             |             |   |    |   |     |      |
|----|----------------------------------------------------------------|---------------------------|----------------------------------------|-----|-------------|-------------|-------------|-------------|-------------|---|----|---|-----|------|
| 85 | Loeys-Dietz syndrome 2                                         | <i>TGFBR2</i>             | g.3073297<br>0G>A                      | AD  | 0001<br>166 | 0002<br>308 | 0012<br>385 | 0004<br>944 | 0001<br>363 | 1 | 1  | 6 | 12  | 108  |
| 86 | Loeys-Dietz syndrome 1                                         | <i>TGFBR1</i>             | g.1019115<br>35G>A                     | AD  | 0005<br>182 | 0001<br>363 | 0000<br>272 | 0000<br>977 | 0001<br>762 | 1 | 1  | 3 | 58  | 12   |
| 87 | Mental retardation, X-linked, syndromic, Christianson type     | <i>SLC9A6</i>             | g.1350806<br>42_13508<br>0643delG<br>A | XLD | 0000<br>717 | 0100<br>543 | 0001<br>263 | 0000<br>400 | 0000<br>020 | - | -  | - | -   | -    |
| 88 | Schizophrenia                                                  | <i>NOS1AP</i>             | g.1623370<br>12G>A                     | AD  | 0000<br>746 | 0002<br>353 | 0000<br>738 | 0100<br>753 | 0007<br>086 | 5 | 36 | - | 964 | 1111 |
| 89 | Pseudoxanthoma elasticum                                       | <i>ABCC6</i>              | g.1625694<br>4G>A                      | AR  | 0001<br>635 | 0001<br>034 | 0004<br>417 | 0001<br>718 | 0000<br>573 | 1 | 1  | 3 | 134 | 39   |
| 90 | Pseudoxanthoma elasticum                                       | <i>ABCC6</i>              | g.1625967<br>9A>G                      | AR  | 0004<br>943 | 0007<br>663 | 0000<br>083 | 0100<br>817 | 0000<br>573 | 1 | 1  | - | -   | -    |
| 91 | Pseudoxanthoma elasticum                                       | <i>ABCC6</i>              | g.1629196<br>0C>T                      | AR  | 0000<br>153 | 0004<br>417 | 0000<br>608 | 0001<br>718 | 0001<br>723 | 1 | 1  | - | 25  | 6    |
| 92 | Hypertrophic osteoarthropathy, primary, autosomal recessive, 2 | <i>SLCO2A</i><br><i>I</i> | g.1336725<br>67C>T                     | AR  | 0002<br>829 | 0001<br>217 | 0030<br>314 |             |             | 1 | 1  | - | 496 | 382  |
| 93 | Ciliary dyskinesia, primary, 3                                 | <i>DNAH5</i>              | g.1377731<br>5delC                     | -   | 0012<br>265 | 0002<br>205 | 0001<br>696 |             |             | 1 | 1  | - | -   | -    |
| 94 | Ciliary dyskinesia, primary, 3                                 | <i>DNAH5</i>              | g.1383078<br>4G>A                      | -   | 0012<br>265 | 0002<br>205 | 0001<br>696 |             |             | 1 | 1  | - | 3   | 1    |

**Supplementary Table S1 – Continued**

|     |                                                                                             |                            |                     |    |             |             |             |             |             |    |    |   |    |   |
|-----|---------------------------------------------------------------------------------------------|----------------------------|---------------------|----|-------------|-------------|-------------|-------------|-------------|----|----|---|----|---|
| 95  | DEAFNESS,<br>AUTOSOMAL<br>RECESSIVE 4,<br>WITH ENLARGED<br>VESTIBULAR<br>AQUEDUCT;<br>DFNB4 | <i>SLC26A4</i>             | g.1073405<br>38C>G  | AR | 0011<br>387 | 0000<br>376 | 0000<br>407 |             |             | 1  | 1  | 5 | ×  | × |
| 96  | THROMBOTIC<br>THROMBOCYTOP<br>ENIC PURPURA,<br>CONGENITAL;<br>TTP                           | <i>ADAMT</i><br><i>S13</i> | g.1363075<br>68A>T  | AR | 0011<br>387 | 0000<br>376 | 0000<br>407 |             |             | 12 | 20 | - | ×  | × |
| 97  | Fabry disease                                                                               | <i>GLA</i>                 | g.1006534<br>58A>G  | XL | 0003<br>119 | 0002<br>376 | 0000<br>962 | 0005<br>144 | 0003<br>326 | 1  | 1  | - | 1  | 1 |
| 98  | Fabry disease                                                                               | <i>GLA</i>                 | g.1006538<br>16A>G  | XL | 0001<br>131 | 0100<br>820 | 0003<br>394 | 0003<br>401 | 0000<br>407 | 1  | 1  | 3 | 10 | 5 |
| 99  | Fabry disease                                                                               | <i>GLA</i>                 | g.1006539<br>30T>C  | XL | 0001<br>369 | 0000<br>708 | 0003<br>326 | 0001<br>658 | 0000<br>093 | 1  | 1  | - | 1  | 2 |
| 100 | Fabry disease                                                                               | <i>GLA</i>                 | g.1006567<br>98delC | XL | 0001<br>681 | 0001<br>014 | 0001<br>369 | 0100<br>543 | 0012<br>702 | 1  | 1  | - | -  | - |

‘-’ - not ranked. ‘×’ - could not analyze.
