# Supplementary material
Source: PubMed Central journal article supplement (PMC6739250)
Supplement: yam-62-244-s002.pdf [file yam-62-244-s002.pdf]

**Supplementary Table S2. Rank positions of causative variants in patients' data**

| Patient | Disease<br>(OMIM term)                                  | Gene         | HGVS<br>notation<br>(GRCh37/<br>hg19)     | Inheritance | HPO ID      |             |             |             |             | Rank    |        |              |                             |                                 |
|---------|---------------------------------------------------------|--------------|-------------------------------------------|-------------|-------------|-------------|-------------|-------------|-------------|---------|--------|--------------|-----------------------------|---------------------------------|
|         |                                                         |              |                                           |             |             |             |             |             |             | hiPHIVE | PhenIX | Phen-<br>Gen | combined<br>max<br>(eXtasy) | order<br>statistics<br>(eXtasy) |
| 1       | CONGENITAL<br>DISORDER OF<br>GLYCOSYLATIO<br>N, TYPE 1K | <i>ALG1</i>  | g.5121993<br>G>A,<br>g.5128843<br>C>T     | AR          | 0003<br>256 | 0002<br>014 | 0001<br>250 | 0000<br>252 | 0001<br>263 | 7       | 10     | 13           | 62                          | 108                             |
| 2       | SOTOS<br>SYNDROME                                       | <i>NSD1</i>  | g.1767158<br>32C>T                        | AD          | 0000<br>256 | 0001<br>548 | 0011<br>622 | 0001<br>643 | 0001<br>263 | 1       | 1      | -            | 25                          | 2                               |
| 3       | JOUBERT<br>SYNDROME 3                                   | <i>AH11</i>  | g.1357543<br>26G>A,<br>g.1357843<br>53C>A | AR          | 0002<br>419 | 0000<br>639 | 0001<br>263 |             |             | 1       | 1      | 6            | -                           | -                               |
| 4       | NEUROFIBROM<br>ATOSIS TYPE 1                            | <i>NF1</i>   | g.2966488<br>0G>A                         | AD          | 0000<br>957 |             |             |             |             | 1       | 1      | -            | ×                           | ×                               |
| 5       | DEAFNESS,<br>AUTOSOMAL<br>DOMINANT 6                    | <i>WFS1</i>  | g.6303911<br>G>A                          | AD          | 0000<br>365 |             |             |             |             | 1       | 1      | -            | ×                           | ×                               |
| 6       | HYPOCHONDRO<br>PLASIA                                   | <i>FGFR3</i> | g.1807371<br>C>A                          | AD          | 0000<br>256 | 0007<br>359 | 0002<br>882 | 0004<br>322 |             | 2       | 1      | -            | 15                          | 1                               |

**Supplementary Table S2 – Continued**

|    |                                                                         |               |                                           |    |             |             |             |             |             |   |   |   |    |    |
|----|-------------------------------------------------------------------------|---------------|-------------------------------------------|----|-------------|-------------|-------------|-------------|-------------|---|---|---|----|----|
| 7  | MITOCHONDRIA<br>L SHORT-CHAIN<br>ENOYL-CoA<br>HYDRATASE 1<br>DEFICIENCY | <i>ECHS1</i>  | g.1351868<br>33G>A,<br>g.1351868<br>37T>C | AR | 0007<br>146 | 0002<br>151 | 0000<br>639 | 0001<br>263 | 0001<br>250 | - | - | - | -  | -  |
| 8  | SOTOS<br>SYNDROME                                                       | <i>NSDI</i>   | g.1767190<br>45C>T                        | AD | 0000<br>256 | 0001<br>263 |             |             |             | 1 | 1 | - | 16 | 13 |
| 9  | AORTIC<br>ANEURYSM<br>FAMILIAL<br>THORACIC 6                            | <i>ACTA2</i>  | g.9069929<br>9C>T                         | AD | 0002<br>622 |             |             |             |             | 1 | 1 | - | ×  | ×  |
| 10 | TELANGIECTASI<br>A HEREDITARY<br>HEMORRHAGIC<br>TYPE 1                  | <i>ENG</i>    | g.1305875<br>54A>AG                       | AD | 0000<br>421 |             |             |             |             | 3 | 1 | - | ×  | ×  |
| 11 | JOUBERT<br>SYNDROME 5                                                   | <i>CEP290</i> | g.8845655<br>6C>T,<br>g.8846243<br>4A>T   | AR | 0002<br>419 | 0001<br>337 | 0000<br>496 | 0001<br>249 |             | 1 | 1 | - | -  | -  |
| 12 | MITOCHONDRIA<br>L SHORT-CHAIN<br>ENOYL-CoA<br>HYDRATASE 1<br>DEFICIENCY | <i>ECHS1</i>  | g.1351841<br>74T>C,<br>g.1351868<br>33G>A | AR | 0007<br>146 | 0002<br>072 | 0001<br>250 | 0001<br>263 |             | - | - | - | -  | -  |

**Supplementary Table S2 – Continued**

|    |                                                                    |                |                                           |    |             |             |             |             |             |   |    |    |     |    |
|----|--------------------------------------------------------------------|----------------|-------------------------------------------|----|-------------|-------------|-------------|-------------|-------------|---|----|----|-----|----|
| 13 | MARFAN<br>SYNDROME                                                 | <i>FBN1</i>    | g.4893692<br>4CG>C                        | AD | 0001<br>166 | 0002<br>622 |             |             |             | 1 | 1  | -  | ×   | ×  |
| 14 | NEUROFIBROM<br>ATOSIS TYPE1                                        | <i>NFI</i>     | g.2955052<br>1CAG>C                       | AD | 0000<br>957 |             |             |             |             | 1 | 1  | -  | ×   | ×  |
| 15 | RETT<br>SYNDROME<br>CONGENITAL<br>VARIANT                          | <i>FOXG1</i>   | g.2923693<br>8C>CG                        | AD | 0005<br>484 | 0001<br>263 | 0007<br>359 | 0002<br>072 |             | 1 | 1  | -  | -   | -  |
| 16 | MIGRAINE<br>FAMILIAL<br>HEMIPLEGIC1                                | <i>CACNA1A</i> | g.1341900<br>3C>G                         | AD | 0006<br>846 | 0001<br>249 | 0001<br>250 |             |             | 4 | 14 | -  | -   | -  |
| 17 | NOONAN<br>SYNDROME-<br>LIKE DISORDER<br>WITH LOOSE<br>ANAGEN HAIR1 | <i>SHOC2</i>   | g.1127241<br>20A>G                        | AD | 0001<br>249 | 0000<br>316 | 0004<br>322 |             |             | 1 | 1  | -  | 198 | 97 |
| 18 | NEUROFIBROM<br>ATOSIS TYPE1                                        | <i>NFI</i>     | g.2966508<br>0GC>G                        | AD | 0000<br>957 | 0001<br>263 |             |             |             | 1 | 1  | -  | ×   | ×  |
| 19 | NIEMANN-PICK<br>DISEASE TYPE<br>C1                                 | <i>NPC1</i>    | g.2112447<br>0T>TAG,<br>g.2114147<br>9G>A | AR | 0002<br>505 | 0001<br>730 | 0001<br>260 | 0100<br>543 | 0000<br>130 | 2 | 16 | 19 | 149 | 18 |
| 20 | NEUROFIBROM<br>ATOSIS TYPE 1                                       | <i>NFI</i>     | g.2956301<br>6T>TA                        | AD | 0000<br>957 |             |             |             |             | 1 | 1  | -  | ×   | ×  |

‘-’ - not ranked. ‘×’ - could not analyze.
